# Supplementary material
Source: PubMed Central journal article supplement (PMC3193471)
Supplement: cr201176x2.pdf [file cr201176x2.pdf]

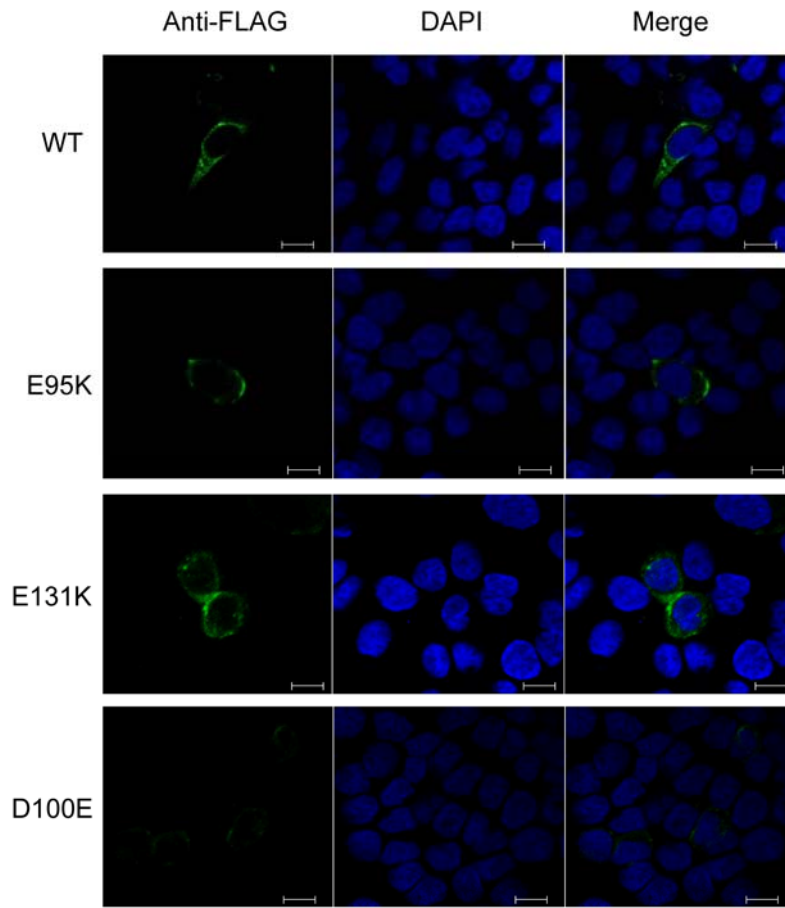

**Supplementary information, Figure S1** The subcellular localization of WT and mutant IhhN in the EcR-CHO cells.

EcR-CHO cells were grown on glass slides to 90% confluency and then transfected with FLAG-tagged WT and mutated *IHH* in a pIND vector as indicated. FLAG-tagged proteins were detected with an anti-flag monoclonal antibody without cell permeabilisation. FITC-labeled goat anti-mouse IgG (Santa Cruz Biotechnology) was used as a secondary antibody, and the fluorescent signal detected by confocal microscopy (Zeiss LSM 510 Meta, Thornwood, NY), localized at the cell membrane. The nuclei were stained with DAPI. The white scale bars represent 10  $\mu$ m.
